# Supplementary material for: Improvingin vitrobioaccessibility and bioactivity of carnosic acid using a lecithin-based nanoemulsion system
Source: Royal Society of Chemistry journal article supplement (doi:10.1039/d0fo02636k), 2020-12-22
Supplement: d0fo02636k1.pdf [file d0fo02636k1.pdf]

## Supplementary information

### Improving *in vitro* bioaccessibility and bioactivity of carnosic acid using lecithin-based nanoemulsion system

Huijuan Zheng,<sup>\*a</sup> Jun Li,<sup>b</sup> Fangjian Ning,<sup>c</sup> Wahyu Wijaya,<sup>d</sup> Yunjiao Chen,<sup>b</sup> Jie Xiao,<sup>b</sup> Yong Cao,<sup>b</sup> and Qingrong Huang<sup>\*a</sup>

**SI-Table 1.** The droplet size and polydispersity index (PDI) of carnosic acid nanoemulsion under different pH conditions

| Storage Time (Days) | Droplet size (nm) and PDI under different pH |                           |                           |                           |                            |                           |
|---------------------|----------------------------------------------|---------------------------|---------------------------|---------------------------|----------------------------|---------------------------|
|                     | 4                                            | 6.2                       | 7.4                       | 8                         | 10                         |                           |
| 1                   | Size                                         | 173.8±1.00 <sup>ca</sup>  | 177.5±1.69 <sup>bcA</sup> | 183.4±1.06 <sup>aA</sup>  | 178.8±1.34 <sup>ba</sup>   | 181.2±0.74 <sup>abA</sup> |
|                     | PDI                                          | 0.205±0.012 <sup>aA</sup> | 0.211±0.018 <sup>aA</sup> | 0.192±0.018 <sup>aA</sup> | 0.205±0.014 <sup>aA</sup>  | 0.186±0.009 <sup>aA</sup> |
| 2                   | Size                                         | 172.0±0.46 <sup>ba</sup>  | 167.2±1.00 <sup>cC</sup>  | 181.5±1.15 <sup>aA</sup>  | 171.3±0.92 <sup>bcB</sup>  | 168.4±0.95 <sup>cC</sup>  |
|                     | PDI                                          | 0.205±0.021 <sup>aA</sup> | 0.202±0.020 <sup>aA</sup> | 0.197±0.021 <sup>aA</sup> | 0.200±0.023 <sup>aA</sup>  | 0.188±0.015 <sup>aA</sup> |
| 3                   | Size                                         | 173.8±1.50 <sup>bcA</sup> | 172.4±1.47 <sup>cb</sup>  | 179.4±1.01 <sup>aA</sup>  | 175.4±2.07 <sup>abAB</sup> | 177.5±1.35 <sup>abB</sup> |
|                     | PDI                                          | 0.215±0.016 <sup>aA</sup> | 0.204±0.014 <sup>aA</sup> | 0.175±0.018 <sup>aA</sup> | 0.186±0.019 <sup>aA</sup>  | 0.196±0.022 <sup>aA</sup> |
| 5                   | Size                                         | 170.9±1.27 <sup>bb</sup>  | 171.5±0.90 <sup>bb</sup>  | 180.5±0.71 <sup>aA</sup>  | 173.3±1.02 <sup>bb</sup>   | 180.6±0.86 <sup>aAB</sup> |
|                     | PDI                                          | 0.234±0.024 <sup>aA</sup> | 0.231±0.015 <sup>aA</sup> | 0.181±0.010 <sup>aA</sup> | 0.211±0.031 <sup>aA</sup>  | 0.201±0.018 <sup>aA</sup> |
| 7                   | Size                                         | 172.1±1.84 <sup>bb</sup>  | 172.2±0.41 <sup>bb</sup>  | 180.1±2.05 <sup>aA</sup>  | 174.7±1.59 <sup>baB</sup>  | 179.9±0.77 <sup>aAB</sup> |
|                     | PDI                                          | 0.221±0.022 <sup>aA</sup> | 0.221±0.016 <sup>aA</sup> | 0.179±0.021 <sup>aA</sup> | 0.187±0.009 <sup>aA</sup>  | 0.200±0.021 <sup>aA</sup> |

Values are means ± SD (n = 3). Different superscript of small letter indicates a significant difference for the same row for the same property ( $p < 0.05$ ), different superscript of capital letter indicates a significant difference for the same column for the same property ( $p < 0.05$ ).

**SI-Table 2.** The droplet size and polydispersity index (PDI) of carnosic acid nanoemulsion under different ionic strength

| Storage Time (Days) |      | Droplet size (nm) and PDI under different ionic strength (mM) |                            |                            |                            |
|---------------------|------|---------------------------------------------------------------|----------------------------|----------------------------|----------------------------|
|                     |      | 0                                                             | 5                          | 10                         | 50                         |
| 1                   | Size | 173.0±1.63 <sup>bB</sup>                                      | 165.6±1.34 <sup>bB</sup>   | 165.5±1.26 <sup>bC</sup>   | 233.2±12.02 <sup>aD</sup>  |
|                     | PDI  | 0.204±0.024 <sup>aA</sup>                                     | 0.213±0.016 <sup>aA</sup>  | 0.191±0.016 <sup>aA</sup>  | 0.241±0.031 <sup>aA</sup>  |
| 2                   | Size | 177.1±1.23 <sup>bAB</sup>                                     | 174.5±1.60 <sup>bcA</sup>  | 170.8±1.64 <sup>cb</sup>   | 284.6±2.74 <sup>aC</sup>   |
|                     | PDI  | 0.211±0.015 <sup>bA</sup>                                     | 0.224±0.015 <sup>abA</sup> | 0.223±0.019 <sup>abA</sup> | 0.278±0.023 <sup>aA</sup>  |
| 3                   | Size | 182.9±2.16 <sup>bA</sup>                                      | 175.7±2.73 <sup>bA</sup>   | 174.9±2.30 <sup>bAB</sup>  | 322.0±16.57 <sup>aBC</sup> |
|                     | PDI  | 0.200±0.025 <sup>aA</sup>                                     | 0.213±0.020 <sup>aA</sup>  | 0.207±0.018 <sup>aA</sup>  | 0.282±0.055 <sup>aA</sup>  |
| 5                   | Size | 176.9±1.74 <sup>bAB</sup>                                     | 173.9±0.90 <sup>bA</sup>   | 176.6±1.31 <sup>bA</sup>   | 361.4±18.09 <sup>aB</sup>  |
|                     | PDI  | 0.186±0.014 <sup>bA</sup>                                     | 0.211±0.021 <sup>bA</sup>  | 0.191±0.013 <sup>bA</sup>  | 0.311±0.041 <sup>bA</sup>  |
| 7                   | Size | 174.7±2.56 <sup>bB</sup>                                      | 175.8±0.95 <sup>bA</sup>   | 172.6±1.23 <sup>bAB</sup>  | 452.4±5.60 <sup>aA</sup>   |
|                     | PDI  | 0.211±0.017 <sup>aA</sup>                                     | 0.212±0.025 <sup>aA</sup>  | 0.209±0.019 <sup>aA</sup>  | 0.287±0.029 <sup>bA</sup>  |

Values are means ± SD (n = 3). Different superscript of small letter indicates a significant difference for the same row for the same property ( $p < 0.05$ ), different superscript of capital letter indicates a significant difference for the same column for the same property ( $p < 0.05$ ).

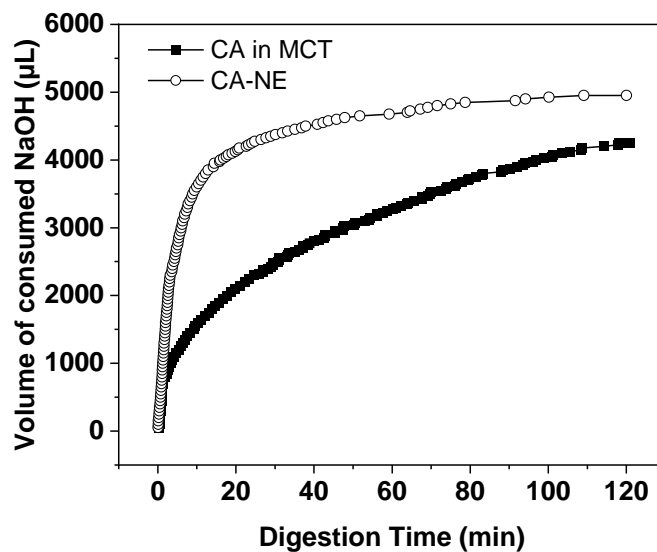

**SI-Figure 1.** Comparison of in vitro lipolysis of CA in MCT oil and CA-NE. The volume of NaOH consumed during the in vitro lipolysis as a function of time.

**SI-Table 3.** Dose-CAA value and the EC<sub>50</sub> value of carnosic acid (CA) and carnosic acid nanoemulsion (CA-NE) (n=3)

|                             | Conc.(uM) | Carnosic acid |            |          | CA-NE    |            |          |
|-----------------------------|-----------|---------------|------------|----------|----------|------------|----------|
|                             |           | Repeat 1      | Repeat 2   | Repeat 3 | Repeat 1 | Repeat 2   | Repeat 3 |
| <b>CAA value</b>            | <b>20</b> | 55.0±5.4      | 62.9±1.1   | 63.5±4.0 | 43.8±6.9 | 51.1±0.6   | 43.8±2.9 |
|                             | <b>10</b> | 45.7±6.9      | 38.8±2.1   | 40.7±2.9 | 27.1±4.3 | 30.1±1.7   | 25.6±3.0 |
|                             | <b>5</b>  | 38.1±3.7      | 28.3±0.7   | 20.1±3.5 | 22.6±3.5 | 21.5±3     | 23.6±1.7 |
|                             | <b>1</b>  | 26.5±6.7      | 5.2±3.8    | 6.7±4.1  | 5.8±0.9  | 9.1±1.9    | 5.2±0.8  |
| <b>EC<sub>50</sub> (μM)</b> |           | 14.12         | 13.02      | 14.00    | 27.54    | 24.32      | 26.92    |
| <b>Average</b>              |           |               |            |          |          |            |          |
| <b>EC<sub>50</sub> (μM)</b> |           |               | 13.71±0.60 |          |          | 26.26±1.71 |          |
